1 **The antidepressant sertraline provides a novel host directed therapy module for**  
2 **augmenting TB therapy**

3 Deepthi Shankaran<sup>1,2</sup>, Anjali Singh<sup>1,2</sup>, Stanzin Dawa<sup>1,2</sup>, Prabhakar A<sup>1,2</sup>, Sheetal Gandotra<sup>1,2</sup>, **Vivek**  
4 **Rao**<sup>1,2\*</sup>

5 1-CSIR- Institute of genomics and Integrative Biology, Mathura Road, New Delhi-110025  
6 India.

7 2- Academy of Scientific and Innovative Research (AcSIR), India

8 \*Corresponding author: Tel: +91 11 29879229, E-mail: vivek.rao@igib.res.in

9 Key words: *Mycobacterium tuberculosis*/ host directed therapy/ antidepressant/ sertraline

10 Running title: **The antidepressant sertraline augments antimycobacterial therapy**

---

11

12 **ABSTRACT:**

13 A prolonged therapy regimen, primarily responsible for development of drug resistance by  
14 *Mycobacterium tuberculosis* (Mtb), the causative agent of human TB, obligates any new regimen  
15 to not only reduce treatment duration but also escape pathogen resistance mechanisms. With  
16 the aim of harnessing the host response in providing additional support to existing regimens (host  
17 directed therapy- HDT), we established the ability of a well-tolerated anti-depressant (sertraline -  
18 SRT) to modulate the pro-pathogenic type I IFN response of macrophages to Mtb infection. More  
19 importantly, while SRT alone could only arrest bacterial growth, it could effectively escalate the  
20 bactericidal activities of Isoniazid (H) and Rifampicin (R) in macrophages. This strengthening of  
21 antibiotic potencies by SRT was more evident in conditions of ineffective control by these frontline  
22 TB drugs: against HR tolerant strains or dormant Mtb. SRT, could significantly combine with  
23 standard TB drugs to enhance early pathogen clearance from tissues of mice infected with either  
24 drug sensitive/ tolerant strains of Mtb. Further, we demonstrate an enhanced protection of the  
25 highly susceptible C3HeB/FeJ mice in an acute model of TB infection with the combination  
26 therapy signifying the use of SRT as a potent adjunct to standard TB therapeutic regimens against

27 bacterial populations of diverse physiology. This study advocates a novel host directed adjunct  
28 therapy regimen for TB with an FDA approved and well tolerated anti-depressant to achieve  
29 quicker and better control of infection.

30 **Abbreviations:** IFN- Interferon, SRT- sertraline hydrochloride, Mtb- *Mycobacterium tuberculosis*,  
31 HDT- host directed therapy

## 32 **Introduction:**

33 The current TB therapy regimen ranging between 6 months for pulmonary and 1-2 years for  
34 extrapulmonary infections, is often associated with severe drug induced toxicity in patients.  
35 Moreover, its failure to completely eradicate the pathogen from the host forms an ideal platform  
36 for the emergence of drug resistant strains<sup>1,2</sup>. It is not surprising that these strains have emerged  
37 at an alarming rate in the population and are imposing serious impediments to TB control  
38 programs globally<sup>3,4</sup>. Introduction of newer modalities like Host directed therapies (HDT) with the  
39 potential to reduce duration of therapy and not be affected by pathogen resistance mechanisms  
40 offer significant advantages in this scenario<sup>5,6</sup>. Several strategies for HDT with diverse modes of  
41 action- boosting immune response<sup>7,8,9</sup>, targeting virulence mechanisms<sup>10-12</sup>, augmenting host  
42 metabolism<sup>13</sup> and host nutrition<sup>14</sup> have been identified in recent times. Effective molecular entities  
43 like antibodies<sup>15,16</sup>, cytokines<sup>17,18</sup>, cell based therapies<sup>19</sup>, drugs used for other human non-  
44 infectious diseases and recombinant proteins<sup>20</sup> have been tested against bacterial infections like  
45 *Streptococcus pneumoniae*<sup>16</sup>, *Bordetella pertussis*<sup>21,22</sup>, *Helicobacter pylori*<sup>23</sup> and against viral  
46 infections like HIV<sup>24</sup>, CMV<sup>25</sup>, Hepatitis C<sup>18</sup>, influenza<sup>26</sup> and Ebola viruses<sup>27</sup>.

47 Mtb infection invokes several mechanisms of pathogen clearance in host cells like induction of  
48 pro-inflammatory response, metabolic stress, phago-lysosomal lysis programs, apoptosis/  
49 autophagic mechanisms<sup>28-30</sup>. Co-evolution with humans has helped Mtb adapt and survive these  
50 host derived stresses through complex and intricate interactions to facilitate optimal infection<sup>31-38</sup>.  
51 Extensive efforts have led to the development of therapeutic strategies countering the pathogen  
52 mediated subversion of cellular clearance mechanisms<sup>14,39-43</sup>.

53 A prominent response of Mtb infected macrophages is the early and robust induction of type I IFN  
54 signaling that is associated with a detrimental effect on host survival<sup>44-47</sup>. We sought to offset this  
55 response in macrophages and evaluate the effect on the infection dynamics. A previous study  
56 identified several antipsychotic molecules as potent antagonists of Type I IFN response to  
57 polyI:C<sup>48</sup>. We hypothesized that this property of antidepressants as TI IFN antagonists might help  
58 stunt this macrophage response. In line with this hypothesis, we demonstrate that the FDA  
59 approved antidepressant, sertraline, previously known to inhibit the formation of the pIRF3-  
60 activation complex formation to effectively inhibit infection induced IFN. We found this inhibition  
61 manifesting as a growth arrest of Mtb in macrophages. Interestingly, SRT could augment  
62 mycobacterial killing in the presence of INH (H) and rifampicin (R), two of the frontline TB drugs  
63 in macrophages by effectively lowering the concentration of antibiotics required to achieve  
64 clearance. Remarkably, the combination proved effective even against dormant bacilli or antibiotic  
65 tolerant Mtb strains. Addition of SRT to TB drugs- HR or HRZE (HR+ pyrazinamide, ethambutol)  
66 significantly protected infected mice from TB related pathology both by enhancing bacterial  
67 clearance and host survival, implying on the usefulness of this combination therapy in both the  
68 intensive (bactericidal) and continuation (sterilizing) phases of anti TB therapy (ATT). Taken  
69 together, we report a novel adjunct TB therapy module by repurposing the FDA approved,  
70 prescription antidepressant -sertraline.

## 71 **Results:**

### 72 **Inhibition of type I IFN in macrophages results in bacterial growth arrest.**

73 Macrophages respond to mycobacterial infection by elaborating an array of signaling cascades  
74 and effector functions<sup>49-51</sup>. Several groups have identified type I IFN signaling as an active and  
75 dominant response of THP1 macrophages to Mtb infection<sup>44,46,52-54</sup>. We questioned the benefit to  
76 Mtb in actively inducing this response and hypothesized that suppressing this response in cells  
77 would alter macrophage infection dynamics. Our previous work indicates a role for nucleic acid  
78 sensing in the Mtb induced Type I IFN response<sup>47</sup>. As an initial step in this direction, we chose

79 previously identified inhibitors of RNA induced Type I IFN response that were also FDA approved  
80 drugs. We used sertraline, a TLR3 signaling antagonist for the ability to modulate Mtb induced  
81 type I IFN response in macrophages. We observed a dose dependent reduction in Mtb induced  
82 type I IFN response of macrophages on treatment with SRT (Fig.1A). While 1 $\mu$ M was minimally  
83 inhibitory, 5 $\mu$ M and 10 $\mu$ M of SRT inhibited the response by 35 and 43% respectively. At a dose  
84 of 20 $\mu$ M, SRT significantly reduced the response to 1/5th of the untreated values (Fig. 1A). SRT  
85 alone did not alter Mtb growth *in vitro* (Fig.1B). While SRT at 200 $\mu$ M completely inhibited growth,  
86 at a ten- fold lower dose of 20 $\mu$ M, a ~50% decrease in growth rates of Mtb was observed by 8  
87 days of *in vitro* culture. Treatment with SRT considerably enabled macrophages to restrict Mtb  
88 growth over a 5-day period of infection. While naïve macrophages were permissive for Mtb growth  
89 by ~5-10 folds, SRT treated macrophages harbored 2-3 fold lesser bacterial numbers  
90 macrophages by the 5<sup>th</sup> day post infection (Fig.1B).

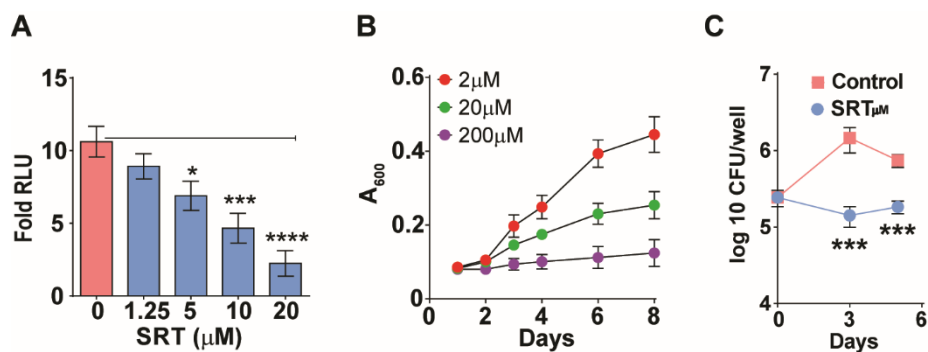

Fig. 1

**Fig. 1: Sertraline inhibits Mtb induced Type I IFN response and restricts intra-macrophage Mtb**

**growth** A) IRF dependent luciferase activity in THP1 Dual macrophages following infection with Mtb at a MOI of 5. Cells were left untreated or treated with increasing concentrations of SRT for 24h in culture and the luminescence in culture supernatants was measured and is represented as mean  $\pm$  SEM from 2 independent experiments with triplicate wells each. B) Growth of Mtb *in vitro* in the presence of 3 concentrations of SRT over 8 days of incubation in 7H9 media at 37 $^{\circ}$ C. At the indicated time points, the plates containing the different wells were used for measurement of OD. Values

106 represented are mean absorbance values  $\pm$  SE of 2 independent experiments. C) Intracellular  
107 bacterial numbers in macrophages infected with Mtb for 6h at MOI of 5 and then left untreated (NT)  
108 or treated with 20 $\mu$ M SRT. Intracellular bacterial numbers at the indicated time points are represented  
109 as average log<sub>10</sub> CFU  $\pm$  SEM from 2 independent experiments with triplicate wells each. (A and C:  
110 unpaired t-test, \*\*p<0.01, \*\*\*p<0.001).

111

### 112 **SRT potentiates antibiotic mediated killing of Mtb in infected macrophages**

113 The observed bacterial stasis in SRT treated macrophages prompted us to analyze the effect of  
114 this treatment in conjunction with frontline antibiotics. To test this, we enumerated Mtb growth in  
115 macrophages following treatment with 200ng/ml INH and 1000ng/ml Rifampicin (HR) alone or in  
116 combination with 20 $\mu$ M SRT (Fig. 2A). Naïve macrophages supported bacterial growth over 5  
117 days of infection with bacterial numbers increasing 4-fold (Fig. 2A). Addition of HR reduced  
118 bacterial numbers by ~62 fold by day 3 and ~92 fold by day 5. Importantly, we observed an  
119 additional 3-fold increase in bacterial killing at day 3 by addition of SRT to the antibiotics (Fig. 2A).  
120 Given the effective control of bacteria by HR, we reasoned that any additional effect of SRT would  
121 be better visible in lower concentrations of antibiotics with reduced efficacy. The effective killing  
122 capacity decreased exponentially as the concentrations were lowered by 10 folds, nearly allowing  
123 bacterial growth (Fig. 2A). Addition of SRT to HR at these concentrations significantly enhanced  
124 the ability of drugs to control Mtb in macrophages. At 0.1X dose of HR, the effective bacterial load  
125 decreased by 2 logs attaining similar levels as HR alone at 1X concentration (Fig. 2A). Even at a  
126 concentration of 0.04X, where HR did not show bactericidal activities, addition of SRT reduced  
127 bacterial numbers by 10-20 folds by day 5 indicating substantial boosting of antibiotic efficacy in  
128 this group (Fig. 2B). Even at 0.01x HR, bacteria grew 4- fold by day 5 in macrophages, and the  
129 addition of SRT enabled restriction of bacterial growth (data not shown).

130 To determine if the effect of SRT was preserved in primary human macrophages, we repeated  
131 these experiment in monocyte derived macrophages from 7 healthy individuals (Fig. 2C).  
132 Although Mtb growth varied in the different individuals, SRT alone was not effective in altering the

133 growth across MDMs from different donors. 0.1X HR exhibited variability in control across  
134 individuals. However, SRT resulted in strong synergistic anti-bacterial activity resulting in 10-15  
135 folds lower bacterial, numbers arguing for a universal adjunct activity of SRT to frontline TB drugs.

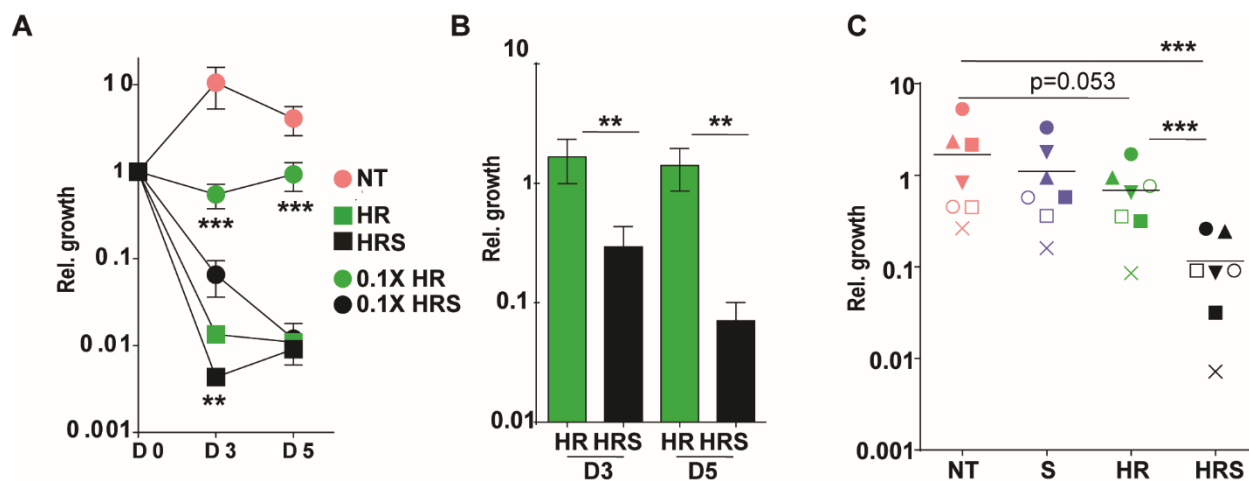

136 **Fig. 2**

137 **Fig. 2: SRT potentiates antimycobacterial activity of TB drugs in Mtb infected macrophages.**

138 Intracellular bacterial numbers of Mtb in THP1 Dual macrophages following infection with MOI5 for  
139 6h and then either left untreated (NT- red) or treated with, (HR -200ng/ml INH (H) and 1000ng/ml  
140 Rif(R)- green) or a combination of all three (HRS- black) for 3 and 5 days. Also included in this  
141 graph are 0.1X of both H and R with and without 20 $\mu$ M SRT. B) Intracellular bacterial survival with  
142 0.04X HR+20 $\mu$ M SRT, represented as growth relative to 0.04X HR. Values are mean $\pm$  SEM of two  
143 independent experiments with triplicate well each. C) Intracellular bacterial growth/survival in  
144 primary human M1- differentiated MDMs from PBMC of seven individuals after 6h infection with  
145 Mtb at MOI-5 and 3 days of treatment with either 20 $\mu$ M SRT2 (S- blue), 0.1X HR, or a combination  
146 of both, represented as CFU counts relative to initial CFU in untreated samples. Each symbol  
147 represents one individual, colors depict the treatment groups as before. Values are mean $\pm$  SEM of  
148 two independent experiments with triplicate well each. (A and B: unpaired t-test, C: paired t-test  
149 comparing ratios \*\*p<0.01, \*\*\*p<0.001).

150

151 **Inclusion of SRT with isoniazid and Rifampicin enhances antibacterial activity even in**  
152 **conditions that promote tolerance.**

153 The inability of ATT to eradicate bacilli from tissues is well recognized; importantly, the ability of  
154 Mtb to enter into a non-replicating dormant state associated with tolerance to frontline drugs is an  
155 important limitation of the current treatment regimen. The ability of SRT to augment Mtb killing  
156 warranted a testing of its efficacy in conditions of antibiotic failure. The recent model of vitamin C  
157 induced dormancy in Mtb replicates this scenario with a complete loss of isoniazid and rifampicin  
158 efficacy in bacterial control<sup>55</sup>. To test, the effectiveness of the adjunct therapy in this model, we  
159 incubated THP1 macrophages with VitC prior to treatment to induce dormancy in bacteria<sup>55</sup>. SRT  
160 was able to induce bacterial stasis in this model, while HR was ineffective at controlling bacterial  
161 growth. However, HR along with SRT led to 10-12 fold reduction in bacterial numbers within 4  
162 days of treatment indicating its activity against dormant Mtb (Fig. 3A).

163 More recently, the inability of drugs to distribute equally amongst the spectrum of granulomatous  
164 lesions was recognized as an important factor in promoting bacterial tolerance and resistance  
165 with the lipid loaded necrotic lesions forming a formidable barrier for entry of frontline TB drugs *in*  
166 *vivo*<sup>56,57</sup>. *In vitro* studies with THP1 macrophages to increase intracellular lipid content (treatment  
167 with oleic acid) mimic conditions of foamy macrophages in advanced necrotic granuloma<sup>58,59</sup>. As  
168 an indirect correlate of efficacy of the combination in these conditions, we tested antibiotic killing  
169 in THP1 cells pre- treated with oleic acid. Again, HR was minimally antibacterial in macrophages  
170 treated with oleic acid (Fig. 3B). In contrast, the combination led to more than 10 fold reduction in  
171 bacterial loads as compared to untreated and HR treated macrophages suggesting the potential  
172 utility of SRT as an adjunct TB regimen under conditions of decreased antibiotic efficacy.

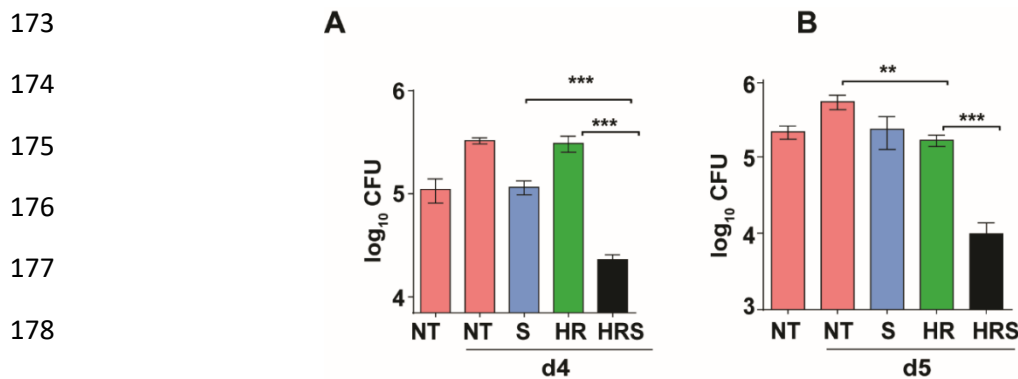

Fig. 3

173

174

175

176

177

178

179

180

181 **Fig. 3: SRT potentiates antimycobacterial activity in conditions favoring bacterial tolerance.**

182 A) Intracellular bacterial growth in THP1 macrophages infected with Mtb at MOI of 5 for 6h and  
183 then treated with 2mM VitC for another 24h. Following this, cells were left untreated (NT) or  
184 treated with SRT, HR or HRS for 3 days. Bacterial numbers at day 4 of infection was  
185 enumerated and is represented as average  $\log_{10}$  CFU  $\pm$  SEM from two independent  
186 experiments with triplicate wells each. B) Bacterial growth in lipid rich conditions: THP1  
187 macrophages were treated with 200 $\mu$ M Oleic acid for 48h prior to infection with Mtb at a MOI  
188 of 5 for 6h and followed with HR, S or HRS treatment for 5 days. Bacterial numbers at day 5  
189 of infection was enumerated and is represented as average  $\log_{10}$  CFU  $\pm$  SEM from two  
190 independent experiments with triplicate wells each. (A and B: unpaired t-test, \*\* $p < 0.01$ ,  
191 \*\*\* $p < 0.001$ ).

192 **SRT effectively reduces macrophage type I IFN and affords better control of mycobacterial**  
193 **growth.**

194 We found that SRT at concentrations as low as 1  $\mu$ M in potentiating antibiotic mediated growth  
195 restriction in macrophages (Fig. 4A). In order to better understand the mechanism of SRT  
196 mediated control of bacterial growth, we first tested if SRT was also potent in supplementing the  
197 activity of HR in *in vitro* culture. As observed in Fig. 4B, *in vitro* SRT even at a 6- fold higher  
198 concentration (6 $\mu$ M) failed to impact Mtb growth either alone or in combination with 3  
199 concentrations of HR. These results hinted at an indirect effect of SRT in enhancing the ability of  
200 macrophages to control bacteria rather than a direct benefit to the microbicidal properties of the



201 antibiotics. To test if SRT induced mycobacterial stasis in macrophages was due to inhibition of  
202 type I IFN expression, we analyzed growth of Mtb in RAW264.7 macrophages deficient in this  
203 signaling component. In contrast to the growth in WT macrophages, Mtb was significantly  
204 restricted in STING<sup>-/-</sup> and TRIF<sup>-/-</sup> macrophages to the initial input levels even after 3 days of culture  
205 (Fig. 4C). Again, the persistent levels of bacterial CFUs without a significant decrease by 3 days  
206 mirrored the situation of bacterial stasis observed in SRT treated macrophages. Evidence for  
207 interferon signaling interference by SRT was also apparent by the 4-fold reduction of IP10  
208 expression levels in Mtb infected macrophages treated with HRS as compared to HR alone after  
209 18h of treatment (Fig. 4D). Further confirmation was achieved by treating macrophages with a  
210 more potent inhibitor of type I IFN signaling- BX795, that completely abrogated Mtb induced type  
211 I IFN at a very low concentrations of 1.2  $\mu$ M (Fig. 4E). Again, while BX795 alone was only capable  
212 of bacteriostasis in macrophages even at 10 $\mu$ M concentrations (Fig. 4F), its addition to ineffective  
213 concentrations of HR enhanced antibiotic mediated bacterial killing by 4-5 folds by 3 days of  
214 infection (Fig. 4G). A recent study by Teles et.al, 2013 suggested the active suppression of IFN $\gamma$   
215 mediated activation of macrophage mediated killing of mycobacteria as one of the potent pro-  
216 pathogenic effects of type I IFN in mycobacterial infections<sup>60</sup>. We hypothesized that if SRT was  
217 efficient in controlling Mtb induced macrophage type I IFN induction the effects of IFN $\gamma$  mediated  
218 activation would be more efficient in controlling infection. As has been reported earlier, IFN $\gamma$   
219 pretreatment was effective in reducing bacterial numbers ~10 fold in comparison to naïve  
220 macrophages by day 3 (Fig. 4H). This killing efficiency was further enhanced 2-fold in  
221 macrophages treated with SRT lending support to the idea of type I IFN repressing macrophage  
222 priming by IFN $\gamma$  and its reversal by addition of SRT. To further probe into the molecular  
223 mechanism of SRT mediated IFN suppression, we analyzed the pro-inflammatory response of  
224 Mtb infected macrophages treated with SRT (Fig 4H-K). Gene expression profiles at 18h of  
225 treatment showed reduction in the expression of TNF and IL1 $\beta$  with SRT treatment. In comparison  
226 to HR treated cells, TNF expression was reduced only slightly in the HRS treated macrophages

227 (Fig. 4I). However, the levels of secreted TNF was significantly altered by SRT treatment; in SRT  
228 alone or HRS treated macrophages, negligible levels of TNF was observed in the cell  
229 supernatants, contrasting with the high levels of TNF (between 500pg- 1ng/ml) in the case of Mtb  
230 infected cells with or without treatment with HR (Fig. 4J).

231 Surprisingly, while expression levels of IL1 $\beta$  were 2-3 folds lower in HRS treated macrophages  
232 by 18h (Fig. 4K), the amount of secreted cytokine was significantly elevated (> 2-3 folds) in  
233 macrophages treated with SRT/ HRS from 18h until 66h strongly indicative of an important role  
234 for the host cell inflammasome activation by SRT (Fig. 4L). In fact, with the studies supporting  
235 the antagonism between type I IFN and inflammasome activation, we tested the efficacy of SRT  
236 to potentiate antibiotic mediated killing in the presence of inflammasome inhibitors. Again, while  
237 SRT enhanced the ability of HR to control Mtb in macrophages, pretreatment of cells with the  
238 inflammasome inhibitor, isoliquiritigenin (I), completely nullified the boosting effect of SRT on  
239 antibiotic efficacy (Fig. 4M) suggesting that the type I IFN modulating effect of SRT was mediated  
240 in part by inflammasome activation.

241

242

243

244

245

246

247

248

249

250

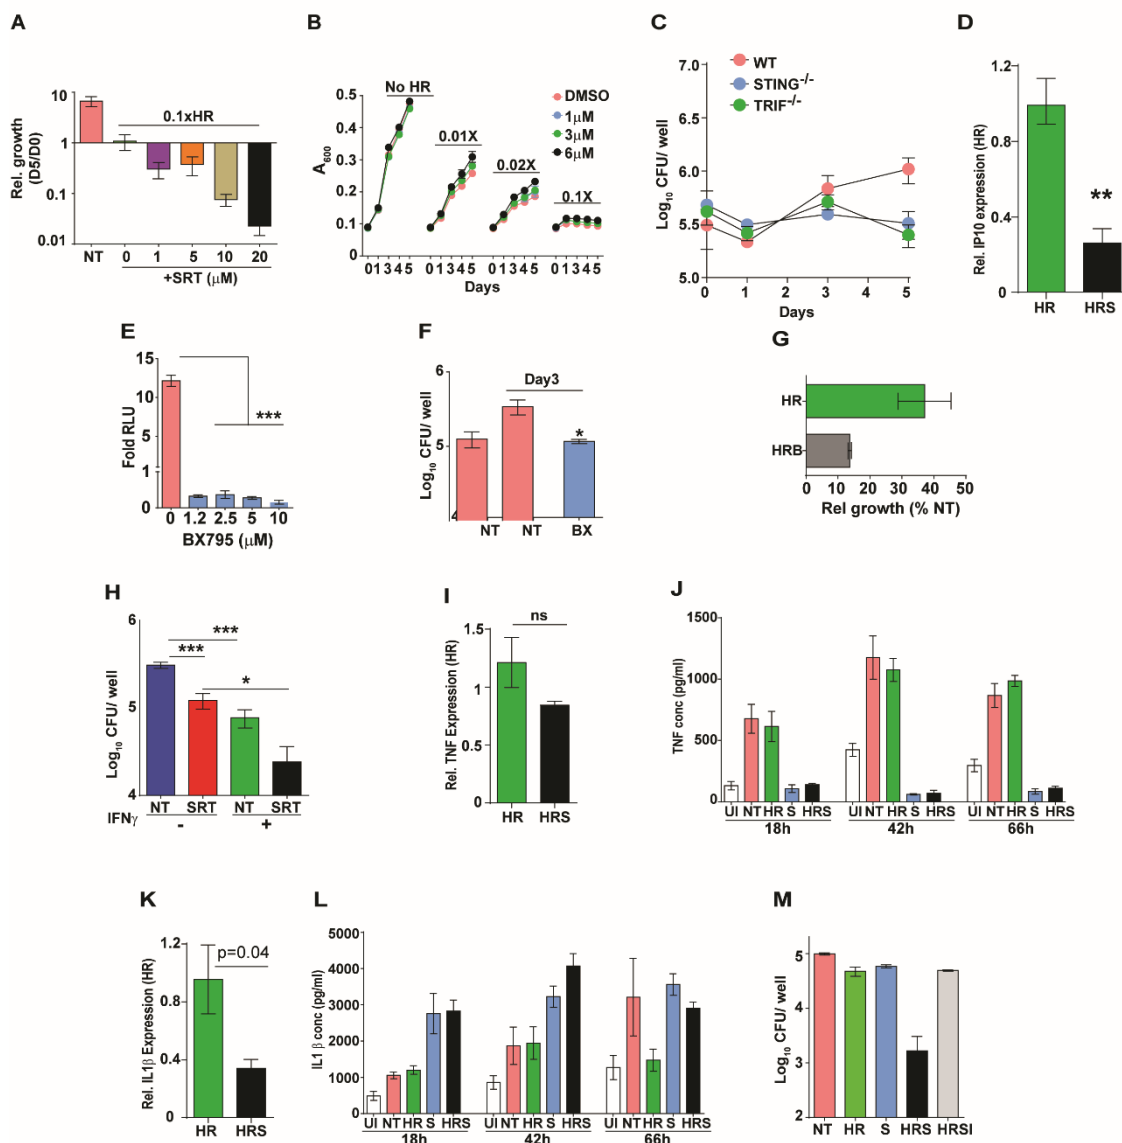

Fig. 4

267 **Fig. 4: Augmentation property of SRT is due to its ability to inhibit IFN signaling.**

268 A) Growth of Mtb in THP1 macrophages following infection at MOI5 for 6h and left untreated (NT) or  
 269 treated with HR at 0.01X MIC with and without different SRT concentrations. The relative bacterial numbers  
 270 at day 5 w.r.t the initial load is represented as mean + SEM from triplicate wells of two independent  
 271 experiments. B) *In vitro* growth of Mtb in 7H9 media containing different concentrations of SRT. Mtb cultures  
 272 were either left untreated or in the presence of different SRT and HR concentrations for 5 days at 37°C.  
 273 The growth was regularly monitored by measuring the optical density of culture and is represented as mean

274  $\pm$  SD of triplicate assay wells of a representative experiment. C) Intracellular bacterial growth in WT, STING<sup>-</sup>  
275 <sup>-</sup> or TRIF<sup>-</sup> deficient RAW264.7 macrophages infected with Mtb at MOI of 5 for 6h and then washed to  
276 remove extracellular bacteria. Intracellular bacterial growth was monitored for 3 days and is represented as  
277 mean  $\pm$  SD log<sub>10</sub> CFU/ well of triplicate wells of a representative experiment of two. D) Expression of IP10  
278 in macrophages infected with Mtb for 6h and then treated with HR alone or in combination with SRT for  
279 18h. The values represented are relative fold expression levels in HRS w.r.t macrophages treated with HR  
280 alone  $\pm$  SEM from two independent experiment with duplicate wells each. E) IRF dependent luciferase  
281 activity in THP1 dual macrophages 24h after treatment with varying doses of BX795 along with infection  
282 with Mtb at MOI of 5. F) Growth of Mtb in THP1 macrophages following treatment with 10 $\mu$ m BX795.  
283 Bacterial numbers were enumerated and log<sub>10</sub> CFU are represented as mean  $\pm$  SE from two independent  
284 experiments with triplicate wells each. G) Relative growth of Mtb in macrophages treated with HR and  
285 HR+Bx795 (HRB) for 3 days. The percentage relative growth of intracellular bacterial numbers in HR or  
286 HRB groups with respect to untreated samples is represented as mean  $\pm$  SE from two independent  
287 experiments with triplicate wells each. H) Growth of Mtb in macrophages pre-treated with IFN $\gamma$  for 16h,  
288 infected with Mtb for 6h and then left untreated or treated with SRT for 3 days. Data are CFU represented  
289 as mean  $\pm$  SEM from two independent experiments with triplicate wells each. I-L) Relative transcript  
290 abundance and secreted TNF (I and J respectively) and IL1 $\beta$  (K and L respectively) in macrophages  
291 infected with Mtb at MOI 5 for 6h and then treated with HR alone or in combination with SRT. Data in I and  
292 K depict fold expression relative to HR alone as mean  $\pm$  SEM from two independent experiments with  
293 duplicate wells each at 18h post treatment. Data in J and L depict secreted cytokines at indicated time  
294 points post treatment as mean  $\pm$  SD for n=3. M) Growth of Mtb in macrophages infected with Mtb for 6h  
295 and then left untreated or treated with HR, SRT, HRS, HRS+ isoliquiritigenin (I) for 5 days. Values  
296 represent average CFU  $\pm$  SD per well of n=3 (unpaired t-test, ns=not significant, \*\*p<0.01, \*\*\*p<0.001).

297 **SRT significantly enhances host survival in an acute infection model of murine TB**  
298 **infection.**

299 With potent efficacy boosting properties of SRT in macrophages, we tested the *in vivo* efficacy of  
300 the combination regimen in an extremely susceptible model of TB infection. We reasoned that the  
301 survival of TB infected C3HeB/FeJ mice would provide an optimal platform for a fast readout of

302 comparative drug efficacies of standard TB drugs and the adjunct regimen with SRT. Given the  
303 excellent ability of infection control by INH and Rifampicin in this model, it was necessary to test  
304 the adjunct effect of SRT in conditions of minimal/ no advantage imparted by the frontline drug  
305 combination alone *i.e.* lower doses -C2 (0.1X) and C3 (0.01X) in addition to the standard dose C1  
306 of HR *ad libitum* in drinking water (Fig. 5A). Aerosol delivery of Mtb at a high dose of ~500  
307 cfu/animal, resulted in precipitous disease with rapid killing of untreated (NT) animals by day 31  
308 of infection (Fig. 5B). To facilitate disease progression prior to treatment initiation, animals  
309 infected with Mtb were left untreated for 2 weeks. SRT alone was effective in delaying the disease  
310 progression in animals as the mean survival time increased from 31 of untreated animals to 38.  
311 HR at the lowest concentration (C3), similar to SRT delayed animal mortality with a mean survival  
312 time of 41 days. The combination of HRC3 and SRT, nearly doubled the MST of mice to 78 days  
313 with significant improvement in the gross lung pathology. This benefit of SRT was similar to that  
314 observed for a 10-fold higher concentration of HR alone (MST of 85 for HRC2). This enhanced  
315 protection was also observed in male mice that received the lowest concentration of drugs  
316 wherein MST of HR+SRT was 100 days in contrast to the significantly shorter MST of 45 days in  
317 the HR alone group (Fig. 5C).

318 The lower efficacy of antibiotics alone was also reflected in the gross pathology of lungs by 30  
319 days; infected animals showed extensive progressive granulomas despite treatment with  
320 antibiotics while a significant amelioration of pathology was observed for the group of animals on  
321 combination regimen (Fig. 5D).

322 All the animals treated with HRC1, HRC1S and HRC2S survived more than 100 days of infection.  
323 We wanted to explore temporal benefits of the combination regimen after withdrawal of a limited  
324 term treatment. A 7-week *ad libitum* treatment with the 10-fold higher dose of HR (HRC2) (Fig.  
325 5E), significantly decreased the MST of animals to 85 days with 100% mortality by 16 weeks. In  
326 contrast, 40% of HRC2S treated animals, survived with a MST of 112 days for the group (Fig. 5F,  
327 G). All animals with the highest dose of HR (HRC1) either alone or with SRT survived the

328 infection. Despite, the significant heterogeneity of treatment response in male and female mice,  
329 with a relatively lower response as evidenced by the greater number of lesions in lungs of male  
330 animals, a co-operative effect of SRT inclusion was evident as a significant improvement in TB  
331 associated lung pathology (Fig. 5H). Small macroscopic lesions were observed in lungs of 60%  
332 of the female mice treated with HRC1 that showed as multiple, well defined granuloma in the H&E  
333 stained sections by the 16<sup>th</sup> week post infection. In contrast, mice treated with SRT and HRC1  
334 showed negligible involvement of the lung tissue in granulomatous cellular accumulation. Even in  
335 tissues of male mice, animals receiving the adjunct therapy showed fewer macroscopic and  
336 significantly lower numbers of microscopic granuloma in lung sections in comparison to animals  
337 treated with the antibiotics alone.

338

339

340

341

342

343

344

345

346

347

348

349

350

351

352

353

354

355

356

357

358

359

360

361

362

363

364

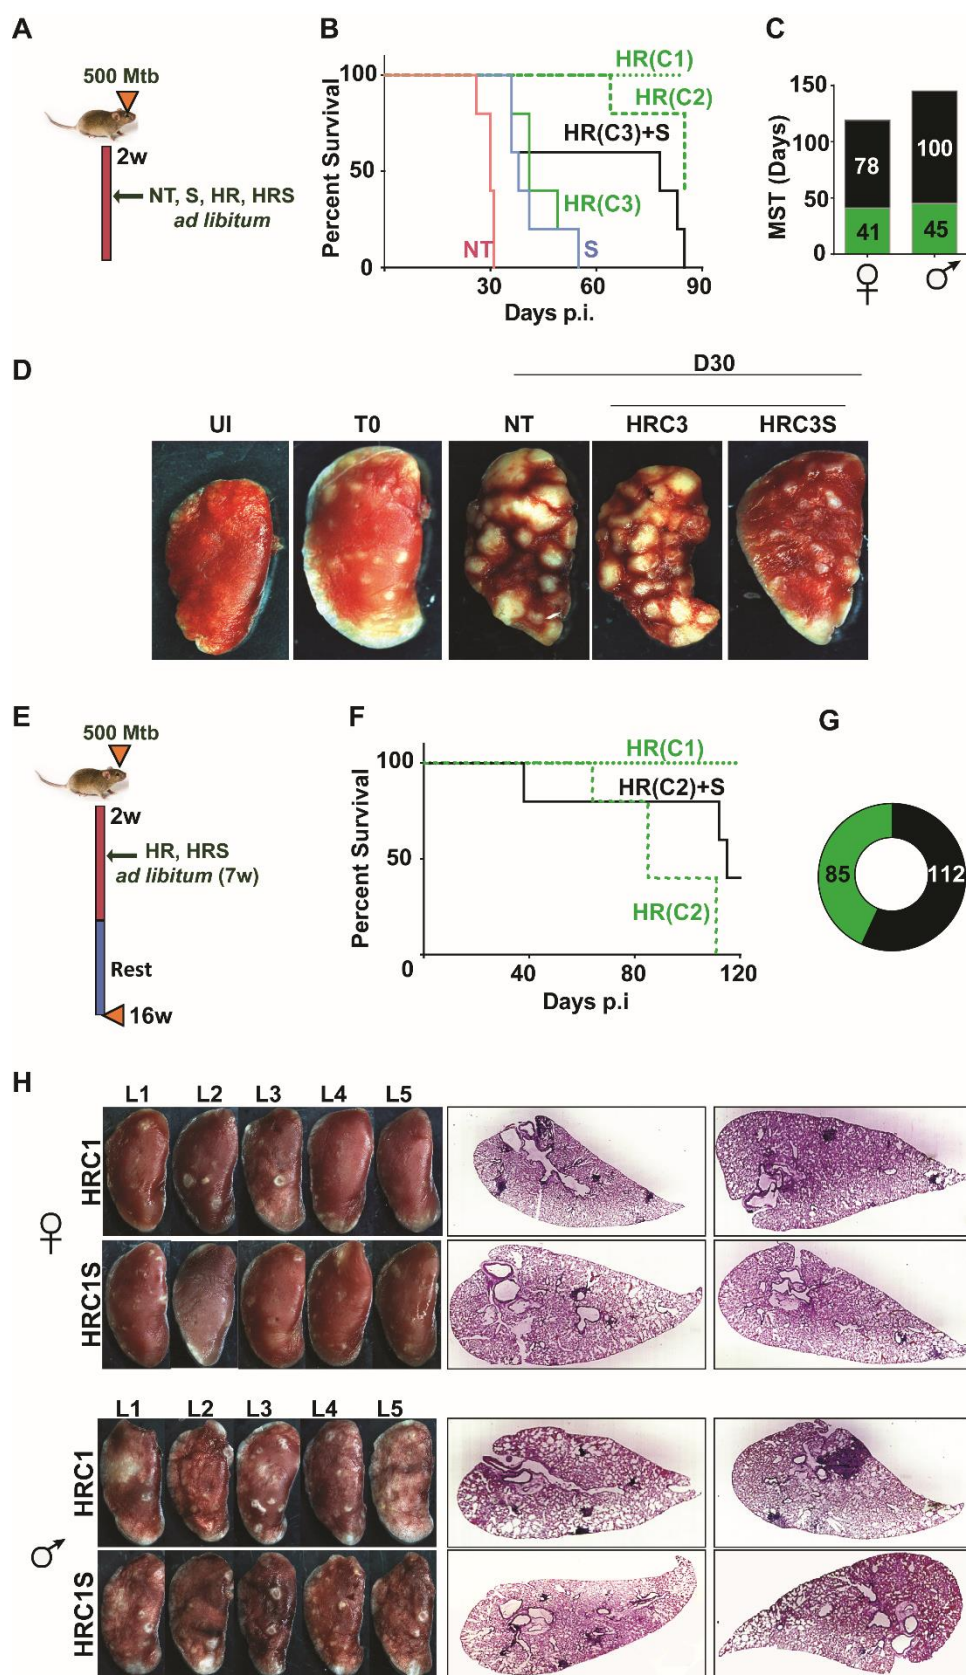

Fig. 5

365 **Fig. 5: Adjunct SRT improves host survival in a susceptible mouse model of infection.**

366 A) Schematic of Mtb infection and drug treatment in C3HeB/FeJ female mice. B) Survival curve of  
367 Mtb infected female C3HeB/FeJ mice treated with different concentrations of H and R (HRC1- 1X:  
368 H-100µg/ml, R-40µg/ml, HRC2-0.1X, HRC3-0.01X) alone or along with SRT (10µg/ml). C) Median  
369 survival time of different treatment groups of mice. D) Gross tissue morphology of lungs of  
370 uninfected animals (UI) and indicated groups at 30 days post infection with Mtb. E) Schematic of  
371 infection and antibiotic treatment in C3Heb/FeJ with HRC2 and HRC1. F-G) Survival (F) and MST  
372 (G) of C3Heb/FeJ mice treated with HRC2 or HRC2S. H) Gross lung morphology at the end of 16  
373 weeks and histochemical sections of lungs with H&E staining of C3HeB/FeJ mice either treated  
374 with HRC1 or in combination with SRT.

375

376 **SRT potentiates bacterial control by anti-tubercular drugs in preclinical models of infection**

377 **Acute disease prevention:** TB treatment in the intensive phase involves the use of 4 frontline  
378 TB drugs- HRZE for a period of two months and HR for an additional 4 months. Further to test  
379 the efficacy of SRT in combination with HRZE in an acute model of disease, Mtb infected  
380 C3HeB/FeJ mice were treated either with the established dose of HRZE or in combination with  
381 SRT (Fig. 6A) and evaluated TB associated pathology of the lungs at 16 weeks of infection. Male  
382 (6B) and female (6C) animals treated with the 4 drugs for 7 weeks harbored  $10^5$ - $10^6$  bacteria in  
383 their lungs, respectively. Addition of SRT appreciably improved drug efficacy, reducing the lung  
384 bacterial loads by a further 5-7 folds (Fig. 6B and C).

385 The drugs efficiently lowered tissue pathology as evidenced by the macroscopic lesions seen in  
386 the lungs of infected mice (Fig. 6D). While both female and male mice showed small macroscopic  
387 lesions in lungs on treatment with HRZE, despite the heterogeneity between the genders, the  
388 combination of SRT and HRZE sufficiently decreased the extent of tissue involvement in TB  
389 associated pathology. This difference was more evident in tissue sections, wherein animals  
390 treated with HRZES were devoid of granulomatous infiltrates in contrast to the HRZE treated  
391 animals which had significantly higher numbers of granulomas in the lungs (Fig. 6D).



392

393

394

395

396

397

398

399

400

401

402

403

404

405

406

407

408

409

410

411

412

413

414

415

416

417

418

419

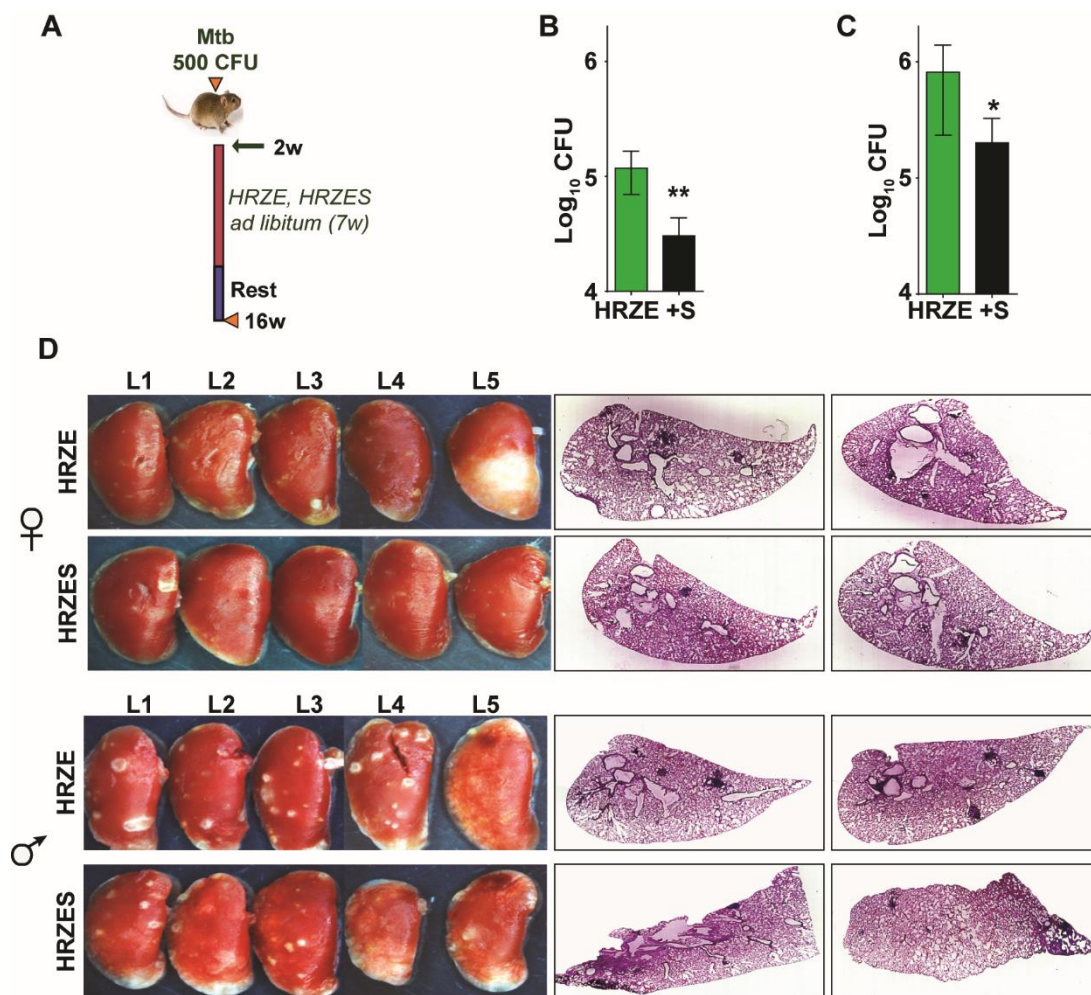

Fig. 6

**Fig. 6: *In vivo* potentiation of SRT mediated antimycobacterial activity**

(A) Schematic of infected C3Heb/FeJ mice and treated with HRZE (HRC1- 1x: H-100 $\mu$ g/ml, R-40 $\mu$ g/ml, Z-150 $\mu$ g/ml, E-100 $\mu$ g/ml) or in combination with SRT (10 $\mu$ g/ml). Animals were euthanized at the end of 16 weeks and extent of infection was determined by estimating bacterial numbers (CFU) in lungs of female (B) and male (C) mice. D) Gross lung morphology and histochemical sections of lungs with H&E staining of C3HeB/FeJ mice infected with Mtb and treated either with HRZE or in combination with SRT. (unpaired t-test, \* $p$ <0.05, \*\* $p$ <0.01).

420 **Short term bacterial clearance:** To evaluate the adjunct regimen for early bacterial clearance  
421 rates, we infected C57BL/6 mice with 500 CFU of Mtb and enumerated bacterial burdens at 1-  
422 and 3-weeks post treatment according to the schedule shown in Fig. 7A. Bacterial numbers in the  
423 lungs reached  $\sim 10^7$  CFU by 4 weeks of infection (day 0 of treatment) and remained steady over  
424 the 6-week period in untreated animals (Fig. 7B). While treatment with HRZE was efficient in  
425 steadily reducing these numbers by  $\sim 100$  folds, addition of SRT to the regimen significantly  
426 enhanced control by a further 2-3 folds. Moreover, the adjunct regimen was efficient in controlling  
427 dissemination of infection into spleens of infected mice (Fig. 7C). Although HRZE reduced splenic  
428 bacterial numbers significantly by 6-7 folds, HRZES was more potent reducing bacterial numbers  
429 further by  $\sim 20$  folds ( $\sim 150x$  decrease in comparison to untreated) by 21 days of treatment. A  
430 similar degree of enhanced bacterial control (4-6 folds lesser bacteria) was observed in lungs and  
431 spleens of Balb/c mice treated with SRT as an adjunct to conventional 4 drug-therapy (Fig. 7D).  
432 The decrease in infection reflected in an overall reduction in the involvement of BL6 lung tissue  
433 in granulomatous lesions (Fig. 7E). Untreated animal lungs showed a gradual consolidation of the  
434 tissue with increasing amounts of granulomatous cellular infiltration by 6 weeks of infection.  
435 Treatment with HRZE was efficient in reducing this infiltration significantly by the 6<sup>th</sup> week of  
436 infection with nearly 1/6<sup>th</sup> of the tissue showing signs of cellular infiltration. Lungs of mice receiving  
437 the combination showed better resolution of granulomas, here the lungs showed significantly  
438 smaller regions of cellular collection by 3 weeks dispersed across the tissue that was more or less  
439 absent from the tissues of mice by the 6<sup>th</sup> week of treatment. This betterment of the granulomatous  
440 lesion was also visible as smaller foci of cellular infiltration in the HRZES treated animals as  
441 compared to the more numbers of macrophages in the NT and HRZE groups.

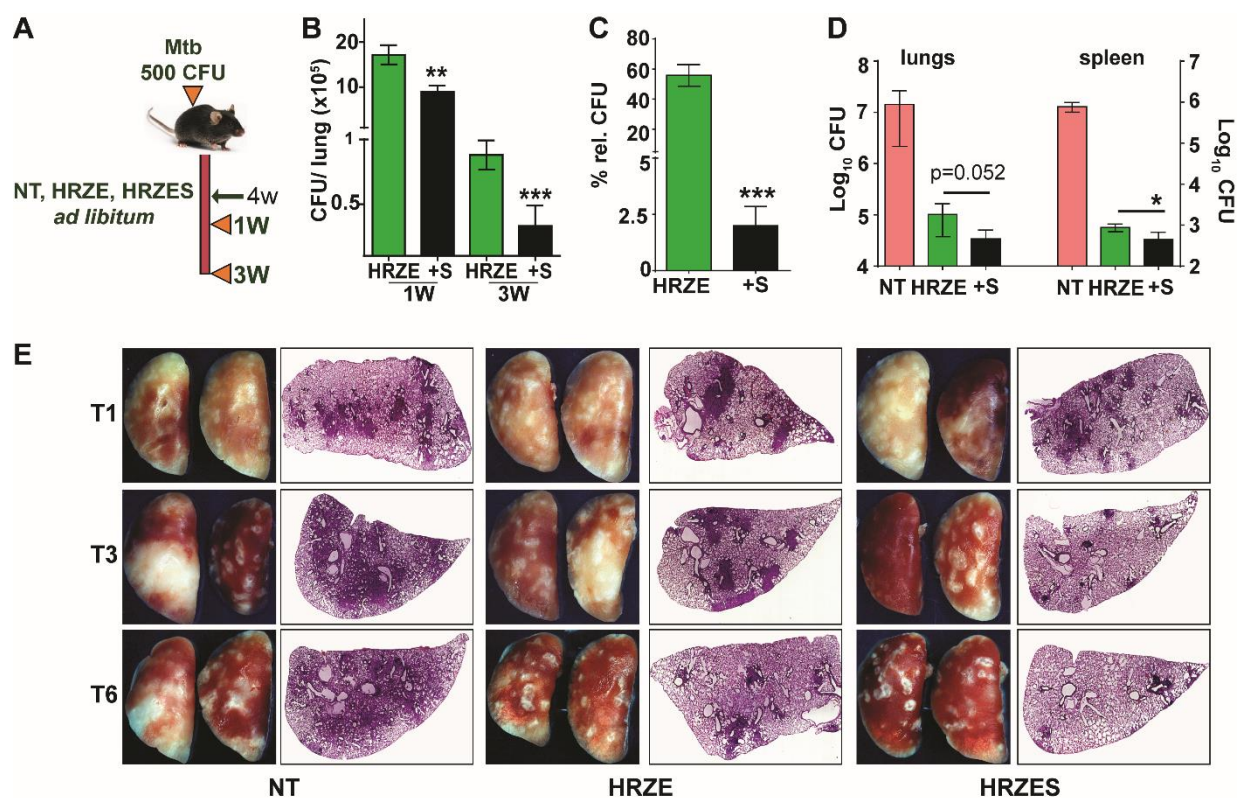

Fig. 7

442

443 **Fig. 7: SRT initiates early bacterial clearance and dissemination in mice.**

444 A) Schematic of Mtb infection and drug treatment in C57BL6/ BalbC mice infected with Mtb and the  
 445 treated with HRZE or HRZES (HRC1- 1X: H-100 $\mu$ g/ml, R-40 $\mu$ g/ml, Z-150 $\mu$ g/ml, E-100 $\mu$ g/ml, SRT  
 446 10 $\mu$ g/ml) treatment. Lung CFU post 1 and 3 weeks (B) and spleen CFU 3 week after (C- relative to  
 447 untreated animals) in Mtb infected C57BL6 mice of antibiotic and SRT administration. D) Lung and  
 448 spleen CFUs of Balb/c mice after 3 weeks of treatment, E) Gross lung morphology and H&E  
 449 staining after treatment for the indicated number of weeks. (unpaired t-test, \* $p < 0.05$ , \*\*\* $p < 0.001$ ).

#### 450 **Efficacy against tolerant Mtb strains:**

451 We then tested the efficacy of the adjunct therapy against a drug tolerant Mtb strain in cellular  
 452 and murine models of infection. Previously, we had demonstrated that N73- a clinical Mtb strain  
 453 belonging to the L1 ancient lineage showed increasing tolerance to INH and Rifampicin as  
 454 opposed to the modern L3 and L4 lineage strains by virtue of expressing the complete MmpL6

455 operon<sup>61</sup>. In THP1 cells infected with Mtb, HR at a concentration of 0.1x supported stasis and  
 456 failed to decrease of bacterial numbers (Fig. 8A). The combination of HR with SRT, significantly  
 457 controlled infection and reduced bacterial numbers by ~10-15 folds by 3 days and ~100 folds by  
 458 day5. The pattern of significantly greater bacterial control was also observed in primary human  
 459 macrophages; again, a combination of HR and SRT reduced intracellular bacterial numbers by 5-  
 460 50 folds in comparison to the drugs alone (Fig. 8B).  
 461 With a strong indication of SRT's ability to boost the efficacy of frontline TB drugs against tolerant  
 462 Mtb, we tested its *in vivo* activity in the acute model of C3HeB/ FeJ mouse infection in combination  
 463 with 0.1x HR (Fig. 8C). As expected, the drugs were not efficient in controlling infection induced  
 464 lesions in the lungs reducing bacterial numbers by 5 folds (Fig. 8D). However, HRS treated  
 465 animals harbored fewer bacteria in the lungs (~5-8 folds than HR). The effect of the combination  
 466 was again better in controlling bacterial numbers in spleens of treated mice wherein HR did not  
 467 reduce CFU in contrast to the 6-8 fold lower bacterial numbers with the combination.

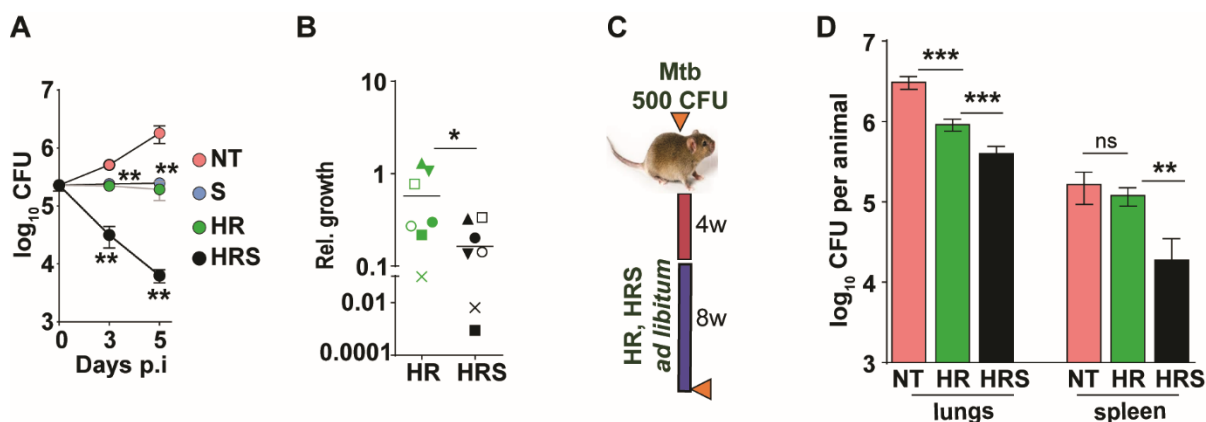

Fig. 8

468  
 469 **Fig. 8: Addition of SRT helps better control of drug tolerant Mtb in vivo.**

470 A) Intracellular bacterial growth in THP1 macrophages infected with HR tolerant Mtb strain at a MOI of 5  
 471 for 6h. Following this, cells were left untreated (NT) or treated with SRT, HR or HRS for 3 or 5 days. Bacterial  
 472 numbers were enumerated and is represented as average log<sub>10</sub> CFU ± SEM from two independent  
 473 experiments with triplicate wells each. B) Bacterial numbers at day 3 of primary monocyte derived

474 macrophages (M1) from 7 independent donors. After 6h of infection, the macrophages were treated with  
475 HR and HRS for 5 days. The ratio of intracellular bacterial numbers in HR or HRS groups with respect to  
476 untreated samples is represented as relative growth with median values indicated by the horizontal line. C)  
477 Schematic of Mtb infection and drug treatment in C3HeB/FeJ mice infected with Mtb for 4 weeks followed  
478 by treatment with 0.1X HR alone or with SRT (HRS) or 8 weeks. Bacterial numbers (CFU) in lungs and  
479 spleen (D) at the end of the experiment are shown as mean  $\pm$  sd (unpaired t-test, ns=not significant,  
480 \*\*p<0.01, \*\*\*p<0.001).

## 481 **DISCUSSION**

482 Despite consistent efforts in identifying novel pathogen targeted interventions and streamlined  
483 pharmaceutical drug development control processes, fewer drugs have been accepted for clinical  
484 use in TB over the last 40 years<sup>62</sup>. Repositioning existing drugs with established safety in humans  
485 is one of the quickest modes of developing effective control of infections that reduce the timeframe  
486 of regimen development. The need for an effective, short and pathogen-sterilizing regimen to  
487 tackle the growing problem of Mtb drug resistance and dormant bacterial populations has  
488 intensified efforts towards the development of host targeted therapies <sup>63-66</sup>.

489 We and several other groups have identified type I IFN as an early response of host macrophages  
490 to infection with Mtb strains <sup>46,47,53,67</sup>. With recent evidences indicating this response as a pathogen  
491 beneficial response, we hypothesized that attenuating this axis would prove beneficial in  
492 controlling bacteria in macrophages. In line with this idea, we observed that the previously  
493 reported TLR3 antagonist – sertraline (SRT) could effectively stunt Mtb induced type I IFN  
494 response in macrophages and also inhibit bacterial growth in macrophages over 5 days of  
495 infection. We provide direct and indirect evidence for the ability of SRT to restrict bacterial growth  
496 by attenuating host cell IFN1 signaling. A similar bacterial growth profile in macrophages 1)  
497 deficient in IFN1 signaling and 2) in response to another IFN1 signaling inhibitor- BX795, that  
498 reverses TBK1 phosphorylation/ activation, hinted at type I IFN inhibition as a basal mechanism  
499 of SRT mediated growth restriction. Consistent with the previous reports of type I IFN mediated

500 repression of pathogen control mechanisms, we observed that inhibition of this response by SRT  
501 enhanced the ability of IFN $\gamma$  primed macrophages to kill Mtb.  
502 To test if targeting type I IFN could be developed into an adjunct HDT along with the current  
503 therapy regimen, we compared the ability of frontline TB drugs like H and R and their combination  
504 with SRT in a macrophage infection model. SRT addition was capable of enhancing the killing  
505 properties of HR significantly even at drug effective concentrations while at lower concentrations  
506 with lesser efficacy, addition of SRT could enhance bacterial clearance 30-50 times nearly at  
507 levels similar to the effective dose of HR alone. More importantly, cells treated with SRT did not  
508 show any evidence of cell lysis/ death. Surprisingly, SRT alone was not effective in bacterial  
509 growth control *in vitro*. We observed that SRT treatment of Mtb infected macrophages reduced  
510 type I IFN signaling, expression of TNF and IL1 $\beta$  in macrophages, despite augmenting the levels  
511 of secreted IL1 $\beta$  in culture supernatants pointing towards the critical role of SRT in inflammasome  
512 activation. While several studies have identified an important role for the host cell inflammasome  
513 in controlling bacterial infections, recent evidence supports an antagonistic role for inflammasome  
514 activation on the type I IFN response of cells<sup>68,69</sup>. A recent study has effectively demonstrated  
515 the importance of host inflammasome in activating eicosanoids that control type I IFN thereby  
516 promoting bacterial clearance<sup>70 71</sup>. Consistent with this observation, targeted therapy towards  
517 elevating PGE2 activity protected mice from acute infection induced fatality<sup>71</sup>. Our results also  
518 highlight this cross- regulation between two important innate response pathways with SRT  
519 boosting the macrophage pathogen control program by repressing a pro- pathogenic and  
520 activating the host beneficial response. Importantly, we observed that addition of previously  
521 identified inflammasome inhibitor –Isoliquiritigenin, nullified the ability of macrophages to respond  
522 to INH and rifampicin (data not shown) hinting at the importance of this critical response in  
523 antimycobacterial activity of these antibiotics within macrophages. In line with this observation,  
524 treatment with these inhibitors also reversed the ability of SRT to enhance the effects of HR in  
525 macrophages. While, we are trying to decipher if SRT directly inhibits type I IFN or via

526 inflammasome activation, our results substantiate the inverse relationship between these two  
527 signaling cascades.

528 However, SRT provides additional benefits as an adjunct modality. The pharmacological  
529 properties of SRT has been well established with excellent PK PD, safety and tolerance for long  
530 term usage in the human population<sup>72-74</sup>. Interestingly, two patients undergoing TB therapy with  
531 INH given SRT as an anti- depressant, did not show any deleterious effects on long term use of  
532 the combination, auguring well for safety in the human population<sup>75,76</sup>. In addition, these studies  
533 combined with the enhanced protective capabilities of the combination therapy in pre-clinical  
534 animal models (our data), rule out any possibility of negative drug-drug interactions between SRT  
535 and ATT on prolonged usage. This long-term standard TB treatment is associated with severe  
536 drug induced depression in patients. Recently depression was identified as an invisible co-  
537 morbidity with TB with extensive synergistic action on the patient<sup>77,78</sup>. It is logical to expect that  
538 SRT with its wide use as an anti- depressant in adults and children may be beneficial in tackling  
539 this dual problem efficiently with a combination regimen of frontline TB drugs and SRT.

540 SRT addition along with standard TB therapy was potent in reducing bacterial numbers in lungs  
541 and spleens of infected mice as early as 3 weeks of treatment. While the lung burden was ~3  
542 folds lower with the combination than with drugs alone, significant reversal of the lung pathology  
543 was suggestive of SRT mediated amplification of drug efficacy. Moreover, spleen of these mice  
544 had significantly lesser bacterial numbers that reflected on the ability of control accessory infected  
545 sites of the host.

546 Additionally, SRT combination therapy with HR, frontline TB drugs used in extended therapy, also  
547 fostered greater clearance of TB associated lung pathology and hence host survival, supporting  
548 the idea that the combination would be effective in both the intensive phase of therapy in reducing  
549 bacterial numbers faster and in the extended phase of TB therapy, overall enhancing host  
550 survival.

551 Considering the ability of SRT to lower type I IFN response in the host, it is plausible to assume  
552 higher susceptibility to viral infections. However, there is no epidemiological data indicating higher  
553 viral infections in patients with long term SRT use for depression. On the contrary, SRT has been  
554 shown to have anti- viral activity<sup>79-81</sup>. SRT has been shown to augment Influenza associated lung  
555 inflammation in conjunction with PDE4 inhibitors in the murine model of infection<sup>82</sup>. In fact, WHO  
556 has identified SRT as one of the anti- Ebola molecules by virtue of its efficacy in *in vitro* model of  
557 infection<sup>83</sup>. However, while SRT as a high dose monotherapy regimen failed to impart protection  
558 to rhesus macaques against Ebola challenge, the animals did not show any adverse effects of  
559 SRT administration further challenging the possibility of an adverse effect of SRT on host anti-  
560 viral responses<sup>84</sup>.

561 While we have supportive evidence for SRT's antibiotic aiding property to be due to its ability to  
562 reduce Mtb induced IFN response, it is logical to assume pleiotropic effects of SRT addition to  
563 the TB drugs resulting in decreased bacterial burdens. Interestingly, previous evidences have  
564 suggested a multi- faceted immune modulating property of SRT and other selective serotonin  
565 reuptake inhibitors from enhancing the anti- inflammatory response<sup>85</sup> to enhancing NK and CD8  
566 cell response<sup>81</sup> to inhibition of acid-sphingomyelinase<sup>86</sup>, an essential component of the viral  
567 trafficking into NPC1+ endosomes in cells. While our work points towards the type I IFN  
568 antagonism mediated inflammasome activation as a key mechanism in providing synergy to anti  
569 TB therapy, the exact molecular target of SRT in this process is an important future challenge.

570 The combined properties of a SRT combination therapy of faster bacterial control, promoting host  
571 survival and ability to target drug tolerant as well as dormant bacterial populations augurs well for  
572 the highly constrained national/ global economy combating the TB pandemic.

573

574 **Material and Methods**



575 **Bacterial Strains and Growth Conditions**—Mtb strains were cultured in Middlebrook 7H9 broth  
576 with 4% ADS or in 7H10/ 7H11 agar (BD Biosciences, USA) with 10% OADC (Himedia  
577 laboratories, India).

578 **Reagents:** THP1 Dual Monocytes was obtained from InvivoGen (Toulouse, France). HiglutaXL  
579 RPMI-1640 and 10% Fetal Bovine Serum (HIMEDIA laboratories, Mumbai, India), PMA (Phorbol  
580 12-Myrystate 13-acetate- P8139, Sigma Aldrich, USA), BX795 (tIrl-bx7, Invivogen) were used for  
581 culture of cells. The following reagents were procured from Sigma Aldrich, USA: Vit C (L- ascorbic  
582 acid, A5960), oleic acid albumin (O3008), Isoniazid (I3377), Pyrazinamide carboxamide (P7136),  
583 Ethambutol dihydrochloride (E4630) and Sertraline hydrochloride (S6319). Rifampicin  
584 (CMS1889, HIMEDIA laboratories, Mumbai, India) and commercially available SRT (Daxid, Pfizer  
585 Ltd, India) was used for mouse studies.

586 **Macrophage infection:** THP1 Dual reporter monocytes were grown in HiglutaXL RPMI-1640  
587 containing 10% FBS and differentiated to macrophages with 100nM PMA for 24h. Following a  
588 period of rest for 48h, cells were infected with single cells suspensions (SCS) of Mtb at a MOI of  
589 5 for 6h. For analyzing the Interferon (IRF pathway) activation levels, supernatants from Mtb  
590 infected THP1 Dual macrophages were assayed for stimulation by measuring luminescence as  
591 per manufacturer's recommendations.

592 **Monocyte derived macrophage culture:** PBMCs were isolated from fresh blood obtained from  
593 healthy donors in accordance with Institutional human ethics committee approval (Ref no: CSIR-  
594 IGIB/IHEC/2017-18 Dt. 08.02.2018). Briefly, 15-20 ml blood was collected in EDTA containing  
595 tubes and layered onto HiSep (HIMEDIA laboratories, Mumbai, India) and used for isolation of  
596 PBMCs according to the recommended protocols. Post RBC lysis, cells were seeded at a density  
597 of  $3 \times 10^5$  cells/ well and differentiated into monocyte derived macrophages with 50ng/ml GMCSF  
598 for 7 days and then used for infection with Mtb.

599 **Analysis of response parameters:** For analysis of different parameters of cellular response to  
600 infection, qRTPCR based gene expression analysis and cytokine ELISA in culture supernatants  
601 were performed according to manufacturer's recommendations.

#### 602 **Analysis of gene expression by qRTPCR**

603 Total RNA was isolated from macrophages suspended in Trizol by using the recommended  
604 protocol. cDNA was prepared from 1 µg of RNA by using the Verso cDNA synthesis kit and was  
605 used at a concentration of 10ng for expression analysis by using the DyNAmo Flash SYBR Green  
606 qPCR Kit (Thermo Fisher Scientific Inc., USA).

#### 607 **Analysis of cytokine secretion by ELISA:**

608 Culture supernatants at different time intervals post infection/ treatment were filtered through a  
609 0.2µ filter and subjected to ELISA by using the eBioscience (Thermo Fisher Scientific Inc. USA)  
610 ELISA kit as per recommended protocols.

611 **Bacterial survival in macrophages:** For determining intra cellular survival of Mtb strains  
612 macrophages were seeded in 48well plates and infected with Mtb at MOI 5 for 6 hours. SRT and  
613 lyophilised BX795 were resuspended in DMSO and used at final concentration of 20 and 10µM,  
614 respectively. Frontline anti mycobacterial drugs were resuspended in DMSO as well and used at  
615 different concentrations – C1, C2, C3 : (C1- INH-200ng/ml, Rifampicin-1000ng/ml, -C2 and C3  
616 :10 and 25 fold dilutions of C1). Macrophages were then treated with antibiotics INH, and Rif with  
617 either BX795 or SRT or alone at specific concentrations. At specific days post infection  
618 macrophages were lysed with water containing 0.05% of tween80. Dilutions of the intracellular  
619 bacterial numbers were made in PBS with 0.05% of tween80 and plated on 7H10 agar plates.  
620 The effect of SRT on bacterial survival was tested in the VitC induced dormancy model of  
621 macrophages as described earlier<sup>55</sup>. Macrophages were treated with 2mM Vit C for 24h and then  
622 treated with 0.1XHR for a further 3 days. For testing in lipid rich macrophages, THP1 Dual  
623 monocytes were treated with oleic acid at 200µM concentration after PMA differentiation for 2

624 days. These lipid rich macrophages were then infected with Mtb and treated with antibiotics and  
625 SRT and checked for bacterial survival at day 5 post infection.

626 **Mouse infection and antibiotic treatment:** (6-10 weeks old) C3HeB/FeJ/ C57BL6/ Balbc  
627 animals were infected with Mtb clinical isolate at 500 CFU per animal through aerosol route. Two  
628 weeks post infection animals were started on antibiotics H (100mg/l), R (40mg/l)<sup>87</sup>, Z (150mg/l),  
629 E (100mg/l)<sup>88</sup> and SRT (10mg/l, human equivalent dose of 3.3 mg/kg/day), as required treatment  
630 by giving all of the drugs *ad libitum* in their drinking water for 7 weeks which was changed twice  
631 every week. For survival, animals were monitored regularly and euthanized at a pre-determined  
632 end point according to the Institutional animal ethics approval. For estimating tissue bacterial  
633 burdens, lungs and spleen of infected animals were collected in sterile saline, subjected to  
634 homogenization and used for serial dilution CFU plating on 7H11 agar plates containing OADC  
635 as supplement. Colonies were counted after incubation of the plates at 37°C for 3-5 weeks and  
636 recorded as CFU/tissue.

637 All statistical analysis was performed by using student's T test for significance, P values of < 0.05  
638 was considered significant.

639 **Acknowledgements:** The authors thank CSIR (VR-BSC0123), and CSIR-OLP1136 funding  
640 agency for supporting the study. CSIR-STS0016 is acknowledged for continuous maintenance of  
641 BSL3 and ABSL2 facilities. The student fellowships from CSIR, UGC and DBT India are  
642 acknowledged: DS- DBT JRF, PA- CSIR-BSC0124, CSIR- SRF, SD-.DBT-JRF. The authors wish  
643 to thanks Dr. Anurag Agrawal, CSIR- IGIB, New Delhi, India and Dr. Michael Glickman, MSKCC,  
644 New York, USA, for suggestion for improving the manuscript.

645  
646 **Author Contributions:** VR, SG, DS, PA were involved in conceptualizing and design of the work,  
647 the work was performed by DS, PA, AS and SD. The manuscript was written by VR and DS.

648

649 **Conflict of interest:** The authors do not have any competing interests.

650

## 651 **References**

652

- 653 1. Blumberg, H.M., *et al.* American Thoracic Society/Centers for Disease Control and  
654 Prevention/Infectious Diseases Society of America: treatment of tuberculosis. *Am J Respir Crit*  
655 *Care Med* **167**, 603-662 (2003).
- 656 2. Sharma, S., *et al.* Index-TB guidelines: Guidelines on extrapulmonary tuberculosis for India. *Indian*  
657 *Journal of Medical Research* **145**, 448-463 (2017).
- 658 3. Falzon, D., *et al.* World Health Organization treatment guidelines for drug-resistant tuberculosis,  
659 2016 update. *Eur Respir J* **49**(2017).
- 660 4. Singh, R., *et al.* Recent updates on drug resistance in Mycobacterium tuberculosis. *J Appl Microbiol*  
661 (2019).
- 662 5. Hancock, R.E., Nijnik, A. & Philpott, D.J. Modulating immunity as a therapy for bacterial infections.  
663 *Nat Rev Microbiol* **10**, 243-254 (2012).
- 664 6. Munguia, J. & Nizet, V. Pharmacological Targeting of the Host-Pathogen Interaction: Alternatives  
665 to Classical Antibiotics to Combat Drug-Resistant Superbugs. *Trends Pharmacol Sci* **38**, 473-488  
666 (2017).
- 667 7. Lange, S.M., *et al.* L-Arginine Synthesis from L-Citrulline in Myeloid Cells Drives Host Defense  
668 against Mycobacteria In Vivo. *J Immunol* **202**, 1747-1754 (2019).
- 669 8. Phelan, J.J., *et al.* Modulating Iron for Metabolic Support of TB Host Defense. *Front Immunol* **9**,  
670 2296 (2018).
- 671 9. Jimenez de Oya, N., Blazquez, A.B., Casas, J., Saiz, J.C. & Martin-Acebes, M.A. Direct Activation of  
672 Adenosine Monophosphate-Activated Protein Kinase (AMPK) by PF-06409577 Inhibits Flavivirus  
673 Infection through Modification of Host Cell Lipid Metabolism. *Antimicrob Agents Chemother*  
674 **62**(2018).
- 675 10. Oh, K.B., Oh, M.N., Kim, J.G., Shin, D.S. & Shin, J. Inhibition of sortase-mediated Staphylococcus  
676 aureus adhesion to fibronectin via fibronectin-binding protein by sortase inhibitors. *Appl*  
677 *Microbiol Biotechnol* **70**, 102-106 (2006).
- 678 11. Cusumano, C.K., *et al.* Treatment and prevention of urinary tract infection with orally active FimH  
679 inhibitors. *Sci Transl Med* **3**, 109ra115 (2011).
- 680 12. Berube, B.J. & Bubeck Wardenburg, J. Staphylococcus aureus alpha-toxin: nearly a century of  
681 intrigue. *Toxins (Basel)* **5**, 1140-1166 (2013).
- 682 13. Blum, C.A., *et al.* Adjunct prednisone therapy for patients with community-acquired pneumonia:  
683 a multicentre, double-blind, randomised, placebo-controlled trial. *Lancet* **385**, 1511-1518 (2015).
- 684 14. Salahuddin, N., *et al.* Vitamin D accelerates clinical recovery from tuberculosis: results of the  
685 SUCCINCT Study [Supplementary Cholecalciferol in recovery from tuberculosis]. A randomized,  
686 placebo-controlled, clinical trial of vitamin D supplementation in patients with pulmonary  
687 tuberculosis'. *BMC Infect Dis* **13**, 22 (2013).
- 688 15. Bruss, J.B. & Siber, G.R. Protective effects of pertussis immunoglobulin (P-IGIV) in the aerosol  
689 challenge model. *Clin Diagn Lab Immunol* **6**, 464-470 (1999).
- 690 16. Li, L., *et al.* Antibody Treatment against Angiotensin-Like 4 Reduces Pulmonary Edema and Injury  
691 in Secondary Pneumococcal Pneumonia. *MBio* **10**(2019).
- 692 17. Wroblewski, L.E., Peek, R.M., Jr. & Wilson, K.T. Helicobacter pylori and gastric cancer: factors that  
693 modulate disease risk. *Clin Microbiol Rev* **23**, 713-739 (2010).

- 694 18. Foster, G.R. Pegylated interferons for the treatment of chronic hepatitis C: pharmacological and  
695 clinical differences between peginterferon-alpha-2a and peginterferon-alpha-2b. *Drugs* **70**, 147-  
696 165 (2010).
- 697 19. Parida, S.K., *et al.* T-Cell Therapy: Options for Infectious Diseases. *Clin Infect Dis* **61Suppl 3**, S217-  
698 224 (2015).
- 699 20. Yedery, R.D. & Jerse, A.E. Augmentation of Cationic Antimicrobial Peptide Production with Histone  
700 Deacetylase Inhibitors as a Novel Epigenetic Therapy for Bacterial Infections. *Antibiotics (Basel)* **4**,  
701 44-61 (2015).
- 702 21. Skerry, C., Scanlon, K., Rosen, H. & Carbonetti, N.H. Sphingosine-1-phosphate Receptor Agonism  
703 Reduces Bordetella pertussis-mediated Lung Pathology. *J Infect Dis* **211**, 1883-1886 (2015).
- 704 22. Scanlon, K.M., Skerry, C. & Carbonetti, N.H. Novel therapies for the treatment of pertussis disease.  
705 *Pathog Dis* **73**, ftv074 (2015).
- 706 23. Guo, L., *et al.* Helicobacter pylori induces increased expression of the vitamin d receptor in  
707 immune responses. *Helicobacter* **19**, 37-47 (2014).
- 708 24. Lopalco, L. CCR5: From Natural Resistance to a New Anti-HIV Strategy. *Viruses* **2**, 574-600 (2010).
- 709 25. Alexander, B.T., *et al.* Use of cytomegalovirus intravenous immune globulin for the adjunctive  
710 treatment of cytomegalovirus in hematopoietic stem cell transplant recipients. *Pharmacotherapy*  
711 **30**, 554-561 (2010).
- 712 26. Zakaria, M.K., Carletti, T. & Marcello, A. Cellular Targets for the Treatment of Flavivirus Infections.  
713 *Front Cell Infect Microbiol* **8**, 398 (2018).
- 714 27. Fedson, D.S., Jacobson, J.R., Rordam, O.M. & Opal, S.M. Treating the Host Response to Ebola Virus  
715 Disease with Generic Statins and Angiotensin Receptor Blockers. *MBio* **6**, e00716 (2015).
- 716 28. Benmerzoug, S., *et al.* GM-CSF targeted immunomodulation affects host response to M.  
717 tuberculosis infection. *Sci Rep* **8**, 8652 (2018).
- 718 29. de Martino, M., Lodi, L., Galli, L. & Chiappini, E. Immune Response to Mycobacterium tuberculosis:  
719 A Narrative Review. *Front Pediatr* **7**, 350 (2019).
- 720 30. Shi, L., Jiang, Q., Bushkin, Y., Subbian, S. & Tyagi, S. Biphasic Dynamics of Macrophage  
721 Immunometabolism during Mycobacterium tuberculosis Infection. *MBio* **10**(2019).
- 722 31. Liu, C.H., Liu, H. & Ge, B. Innate immunity in tuberculosis: host defense vs pathogen evasion. *Cell*  
723 *Mol Immunol* **14**, 963-975 (2017).
- 724 32. Padhi, A., *et al.* Mycobacterium tuberculosis LprE Suppresses TLR2-Dependent Cathelicidin and  
725 Autophagy Expression to Enhance Bacterial Survival in Macrophages. *J Immunol* **203**, 2665-2678  
726 (2019).
- 727 33. Dey, R.J., *et al.* Inhibition of innate immune cytosolic surveillance by an M. tuberculosis  
728 phosphodiesterase. *Nat Chem Biol* **13**, 210-217 (2017).
- 729 34. Gupta, S., Winglee, K., Gallo, R. & Bishai, W.R. Bacterial subversion of cAMP signalling inhibits  
730 cathelicidin expression, which is required for innate resistance to Mycobacterium tuberculosis. *J*  
731 *Pathol* **242**, 52-61 (2017).
- 732 35. Brites, D. & Gagneux, S. Co-evolution of Mycobacterium tuberculosis and Homo sapiens. *Immunol*  
733 *Rev* **264**, 6-24 (2015).
- 734 36. Lin, W., *et al.* Transcriptional Profiling of Mycobacterium tuberculosis Exposed to In Vitro  
735 Lysosomal Stress. *Infect Immun* **84**, 2505-2523 (2016).
- 736 37. Smith, D.G., *et al.* Identification and characterization of a novel anti-inflammatory lipid isolated  
737 from Mycobacterium vaccae, a soil-derived bacterium with immunoregulatory and stress  
738 resilience properties. *Psychopharmacology (Berl)* **236**, 1653-1670 (2019).
- 739 38. Mehta, M. & Singh, A. Mycobacterium tuberculosis WhiB3 maintains redox homeostasis and  
740 survival in response to reactive oxygen and nitrogen species. *Free Radic Biol Med* **131**, 50-58  
741 (2019).

- 742 39. Suarez-Mendez, R., *et al.* Adjuvant interferon gamma in patients with drug - resistant pulmonary  
743 tuberculosis: a pilot study. *BMC Infect Dis* **4**, 44 (2004).
- 744 40. Singhal, A., *et al.* Metformin as adjunct antituberculosis therapy. *Sci Transl Med* **6**, 263ra159  
745 (2014).
- 746 41. Naftalin, C.M., *et al.* Adjunctive use of celecoxib with anti-tuberculosis drugs: evaluation in a  
747 whole-blood bactericidal activity model. *Sci Rep* **8**, 13491 (2018).
- 748 42. Lachmandas, E., *et al.* Metformin Alters Human Host Responses to Mycobacterium tuberculosis  
749 in Healthy Subjects. *J Infect Dis* **220**, 139-150 (2019).
- 750 43. Rayasam, G.V. & Balganesh, T.S. Exploring the potential of adjunct therapy in tuberculosis. *Trends*  
751 *Pharmacol Sci* **36**, 506-513 (2015).
- 752 44. Dorhoi, A., *et al.* Type I IFN signaling triggers immunopathology in tuberculosis-susceptible mice  
753 by modulating lung phagocyte dynamics. *Eur J Immunol* **44**, 2380-2393 (2014).
- 754 45. Watson, R.O., *et al.* The Cytosolic Sensor cGAS Detects Mycobacterium tuberculosis DNA to  
755 Induce Type I Interferons and Activate Autophagy. *Cell Host Microbe* **17**, 811-819 (2015).
- 756 46. Donovan, M.L., Schultz, T.E., Duke, T.J. & Blumenthal, A. Type I Interferons in the Pathogenesis of  
757 Tuberculosis: Molecular Drivers and Immunological Consequences. *Front Immunol* **8**, 1633 (2017).
- 758 47. Shankaran, D., Arumugam, P., Bothra, A., Gandotra, S. & Vivek, R. Modern clinical Mtb strains  
759 leverage the type I IFN pathway for a pro-inflammatory response in the host. *bioRxiv* (2019).
- 760 48. Zhu, J., *et al.* High-throughput screening for TLR3-IFN regulatory factor 3 signaling pathway  
761 modulators identifies several antipsychotic drugs as TLR inhibitors. *J Immunol* **184**, 5768-5776  
762 (2010).
- 763 49. Liu, C.H., Liu, H. & Ge, B. Innate immunity in tuberculosis: host defense vs pathogen evasion. *Cell*  
764 *Mol Immunol* (2017).
- 765 50. Xu, G., Wang, J., Gao, G.F. & Liu, C.H. Insights into battles between Mycobacterium tuberculosis  
766 and macrophages. *Protein Cell* **5**, 728-736 (2014).
- 767 51. Petit-Jentreau, L., Tailleux, L. & Coombes, J.L. Purinergic Signaling: A Common Path in the  
768 Macrophage Response against Mycobacterium tuberculosis and Toxoplasma gondii. *Front Cell*  
769 *Infect Microbiol* **7**, 347 (2017).
- 770 52. Wassermann, R., *et al.* Mycobacterium tuberculosis Differentially Activates cGAS- and  
771 Inflammasome-Dependent Intracellular Immune Responses through ESX-1. *Cell Host Microbe* **17**,  
772 799-810 (2015).
- 773 53. Moreira-Teixeira, L., Mayer-Barber, K., Sher, A. & O'Garra, A. Type I interferons in tuberculosis:  
774 Foe and occasionally friend. *J Exp Med* **215**, 1273-1285 (2018).
- 775 54. Wiens, K.E. & Ernst, J.D. The Mechanism for Type I Interferon Induction by Mycobacterium  
776 tuberculosis is Bacterial Strain-Dependent. *PLoS Pathog* **12**, e1005809 (2016).
- 777 55. Sikri, K., *et al.* Multifaceted remodeling by vitamin C boosts sensitivity of Mycobacterium  
778 tuberculosis subpopulations to combination treatment by anti-tubercular drugs. *Redox Biol* **15**,  
779 452-466 (2018).
- 780 56. Tobach, E. Developmental aspects of chemoception in the Wistar (DAB) rat: tonic processes. *Ann*  
781 *N Y Acad Sci* **290**, 226-269 (1977).
- 782 57. Dartois, V. The path of anti-tuberculosis drugs: from blood to lesions to mycobacterial cells. *Nat*  
783 *Rev Microbiol* **12**, 159-167 (2014).
- 784 58. Jaisinghani, N., *et al.* Necrosis Driven Triglyceride Synthesis Primes Macrophages for Inflammation  
785 During Mycobacterium tuberculosis Infection. *Front Immunol* **9**, 1490 (2018).
- 786 59. Baek, S.H., Li, A.H. & Sasseti, C.M. Metabolic regulation of mycobacterial growth and antibiotic  
787 sensitivity. *PLoS Biol* **9**, e1001065 (2011).
- 788 60. Teles, R.M., *et al.* Type I interferon suppresses type II interferon-triggered human anti-  
789 mycobacterial responses. *Science* **339**, 1448-1453 (2013).

- 790 61. Arumugam, P., Shankaran, D., Bothra, A., Gandotra, S. & Rao, V. The MmpS6-MmpL6 Operon Is  
791 an Oxidative Stress Response System Providing Selective Advantage to Mycobacterium  
792 tuberculosis in Stress. *J Infect Dis* **219**, 459-469 (2019).
- 793 62. Goel, D. Bedaquiline: A novel drug to combat multiple drug-resistant tuberculosis. *J Pharmacol*  
794 *Pharmacother* **5**, 76-78 (2014).
- 795 63. Palucci, I. & Delogu, G. Host Directed Therapies for Tuberculosis: Futures Strategies for an Ancient  
796 Disease. *Chemotherapy* **63**, 172-180 (2018).
- 797 64. Mishra, R., *et al.* Targeting redox heterogeneity to counteract drug tolerance in replicating  
798 Mycobacterium tuberculosis. *Sci Transl Med* **11**(2019).
- 799 65. Fatima, S., *et al.* Mycobacterium tuberculosis programs mesenchymal stem cells to establish  
800 dormancy and persistence. *J Clin Invest* (2019).
- 801 66. Dara, Y., Volcani, D., Shah, K., Shin, K. & Venketaraman, V. Potentials of Host-Directed Therapies  
802 in Tuberculosis Management. *J Clin Med* **8**(2019).
- 803 67. McNab, F.W., *et al.* Type I IFN induces IL-10 production in an IL-27-independent manner and  
804 blocks responsiveness to IFN-gamma for production of IL-12 and bacterial killing in  
805 Mycobacterium tuberculosis-infected macrophages. *J Immunol* **193**, 3600-3612 (2014).
- 806 68. Novikov, A., *et al.* Mycobacterium tuberculosis triggers host type I IFN signaling to regulate IL-  
807 1beta production in human macrophages. *J Immunol* **187**, 2540-2547 (2011).
- 808 69. Ji, D.X., *et al.* Type I interferon-driven susceptibility to Mycobacterium tuberculosis is mediated  
809 by IL-1Ra. *Nat Microbiol* **4**, 2128-2135 (2019).
- 810 70. Hawn, T.R., Shah, J.A. & Kalman, D. New tricks for old dogs: countering antibiotic resistance in  
811 tuberculosis with host-directed therapeutics. *Immunol Rev* **264**, 344-362 (2015).
- 812 71. Mayer-Barber, K.D., *et al.* Host-directed therapy of tuberculosis based on interleukin-1 and type I  
813 interferon crosstalk. *Nature* **511**, 99-103 (2014).
- 814 72. Sheehan, D.V. & Kamijima, K. An evidence-based review of the clinical use of sertraline in mood  
815 and anxiety disorders. *Int Clin Psychopharmacol* **24**, 43-60 (2009).
- 816 73. Ronfeld, R.A., Wilner, K.D. & Baris, B.A. Sertraline. Chronopharmacokinetics and the effect of  
817 coadministration with food. *Clin Pharmacokinet* **32 Suppl 1**, 50-55 (1997).
- 818 74. Mandrioli, R., Mercolini, L. & Raggi, M.A. Evaluation of the pharmacokinetics, safety and clinical  
819 efficacy of sertraline used to treat social anxiety. *Expert Opin Drug Metab Toxicol* **9**, 1495-1505  
820 (2013).
- 821 75. Malek-Ahmadi, P., Chavez, M. & Contreras, S.A. Coadministration of isoniazid and antidepressant  
822 drugs. *J Clin Psychiatry* **57**, 550 (1996).
- 823 76. Judd, F.K., Mijch, A.M., Cockram, A. & Norman, T.R. Isoniazid and antidepressants: is there cause  
824 for concern? *Int Clin Psychopharmacol* **9**, 123-125 (1994).
- 825 77. Sweetland, A.C., *et al.* Addressing the tuberculosis-depression syndemic to end the tuberculosis  
826 epidemic. *Int J Tuberc Lung Dis* **21**, 852-861 (2017).
- 827 78. Trenton, A.J. & Currier, G.W. Treatment of Comorbid Tuberculosis and Depression. *Prim Care*  
828 *Companion J Clin Psychiatry* **3**, 236-243 (2001).
- 829 79. Johansen, L.M., *et al.* A screen of approved drugs and molecular probes identifies therapeutics  
830 with anti-Ebola virus activity. *Sci Transl Med* **7**, 290ra289 (2015).
- 831 80. Ehret, M. & Sobieraj, D.M. Prevention of interferon-alpha-associated depression with  
832 antidepressant medications in patients with hepatitis C virus: a systematic review and meta-  
833 analysis. *Int J Clin Pract* **68**, 255-261 (2014).
- 834 81. Benton, T., *et al.* Selective serotonin reuptake inhibitor suppression of HIV infectivity and  
835 replication. *Psychosom Med* **72**, 925-932 (2010).
- 836 82. Sharma, G., *et al.* Reduction of influenza virus-induced lung inflammation and mortality in animals  
837 treated with a phosphodiesterase-4 inhibitor and a selective serotonin reuptake inhibitor. *Emerg*  
838 *Microbes Infect* **2**, e54 (2013).

- 839 83. WHO. Categorization and prioritization of drugs for consideration for testing or use in patients  
840 infected with
- 841 Ebola. (2015).
- 842 84. Honko, A.N., *et al.* High dose sertraline monotherapy fails to protect rhesus macaques from lethal  
843 challenge with Ebola virus Makona. *Sci Rep* **7**, 5886 (2017).
- 844 85. Hannestad, J., DellaGioia, N. & Bloch, M. The effect of antidepressant medication treatment on  
845 serum levels of inflammatory cytokines: a meta-analysis. *Neuropsychopharmacology* **36**, 2452-  
846 2459 (2011).
- 847 86. Kouznetsova, J., *et al.* Identification of 53 compounds that block Ebola virus-like particle entry via  
848 a repurposing screen of approved drugs. *Emerg Microbes Infect* **3**, e84 (2014).
- 849 87. Vilcheze, C., Kim, J. & Jacobs, W.R., Jr. Vitamin C Potentiates the Killing of Mycobacterium  
850 tuberculosis by the First-Line Tuberculosis Drugs Isoniazid and Rifampin in Mice. *Antimicrob*  
851 *Agents Chemother* **62**(2018).
- 852 88. Lanoix, J.P., Betoudji, F. & Nuermberger, E. Sterilizing Activity of Pyrazinamide in Combination  
853 with First-Line Drugs in a C3HeB/FeJ Mouse Model of Tuberculosis. *Antimicrob Agents Chemother*  
854 **60**, 1091-1096 (2016).
- 855
- 856
